# Supplementary material
Source: PubMed Central journal article supplement (PMC6711757)
Supplement: EMS82682-supplement-1.pdf [file EMS82682-supplement-1.pdf]

## **Supplementary Information**

### **Structural basis for inhibition of *Plasmodium vivax* invasion by a broadly neutralising vaccine-induced human antibody**

Thomas. A. Rawlinson, Natalie M. Barber, Franziska Mohring, Jee Sun Cho, Varakorn Kosaisavee, Samuel F. Gérard, Daniel G. W. Alanine, Geneviève M. Labbé, Sean C. Elias, Sarah E. Silk, Doris Quinkert, Jing Jin, Jennifer M. Marshall, Ruth O. Payne, Angela M. Minassian, Bruce Russell, Laurent Rénia, François H. Nosten, Robert W. Moon, Matthew K. Higgins and Simon J. Draper

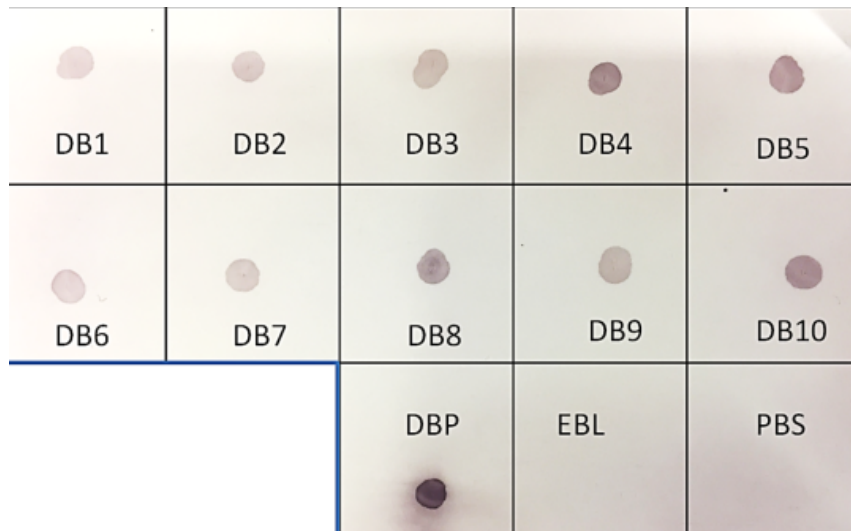

**Supplementary Figure 1: Recognition by *Pv*DBP from culture supernatants by dot blot**

Dot blot assay showing binding of the ten human anti-*Pv*DBP mAbs to native *Pv*DBP secreted in the supernatant of a short-term *in vitro* culture of *Plasmodium vivax*. The positive control was recombinant *Pv*DBP (DBP) and the two negative controls were a human anti- *Ebolavirus* GP IgG1 mAb (EBL) and PBS. This assay was conducted once due to limited quantities of culture supernatant.

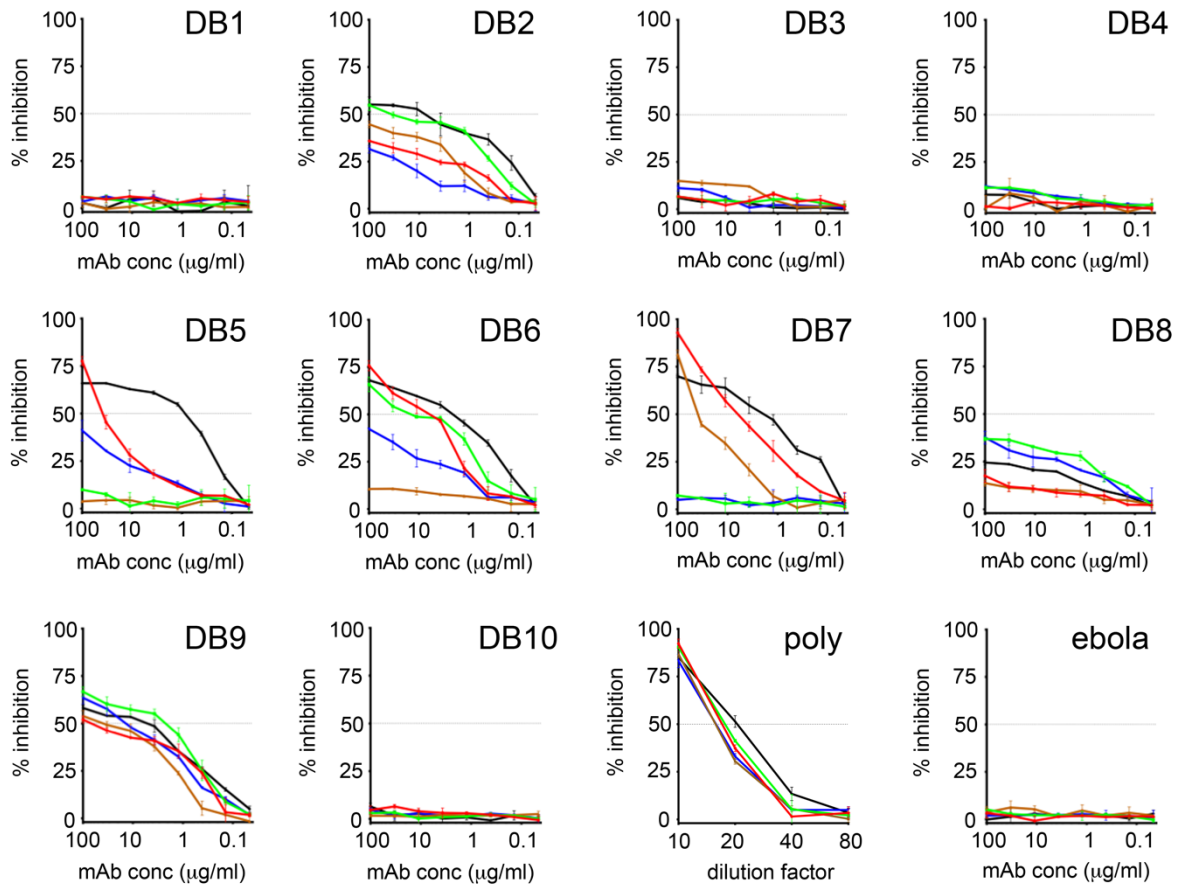

**Supplementary Figure 2: Anti-*PvDBP* II mAb inhibition of the binding of recombinant *PvDBP* II variants to the recombinant N-terminal 60 amino acid DARC ectodomain**

The binding of five naturally occurring variants of *PvDBP* II to the DARC ectodomain in the presence of increasing concentrations of each of DB1-DB10. The variants are Sall (red), AH (green), O (brown), P (blue) and HMP013 (black). “poly” is polyclonal human anti-*PvDBP* II serum from the VAC051 clinical trial<sup>19</sup>, while “ebola” is an anti-*Ebolavirus* recombinant human IgG1 mAb included as a negative control. Data points represent the mean of three technical replicates, while the error bars represent the standard deviation.

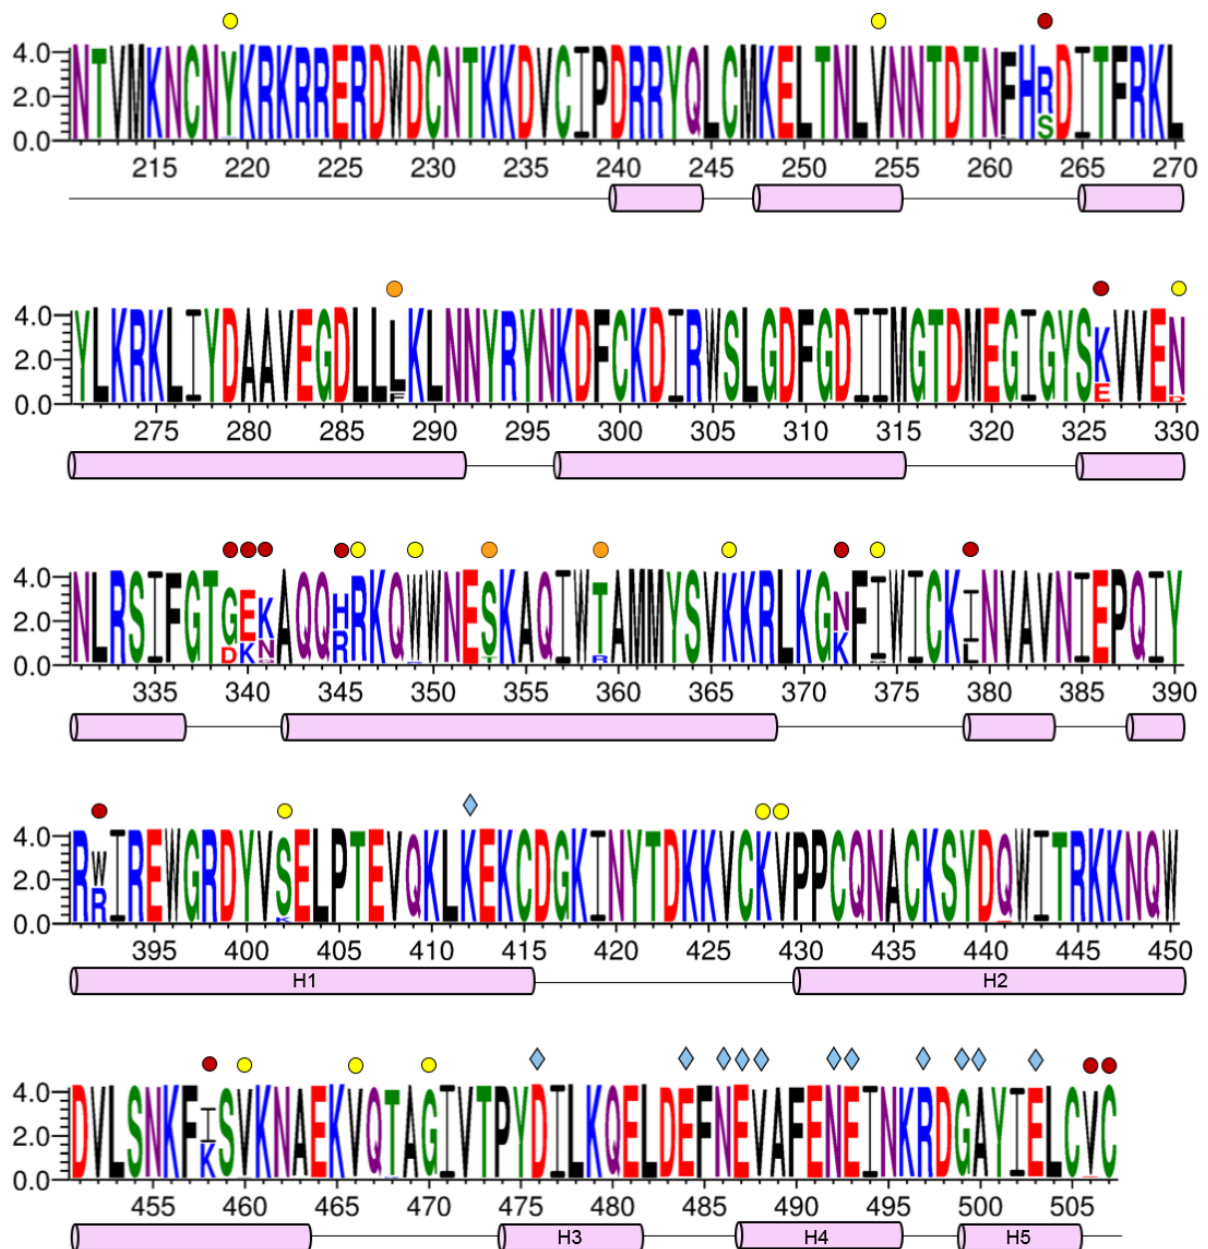

**Supplementary Figure 3: Sequence logo representing sequence conservation across PvDBP II**

Sequence logo derived from 383 sequences of PvDBP II from *Plasmodium vivax* isolates. Underneath the logo is the residue number from the Sall PvDBP II variant. Cylinders represent the location of helices while lines represent loops. Above the sequence, blue kites indicate residues which directly contact DB9. Yellow, orange and red circles represent residues with sequence entropies of 0.15-0.3, 0.3-0.45 and >0.45 respectively.

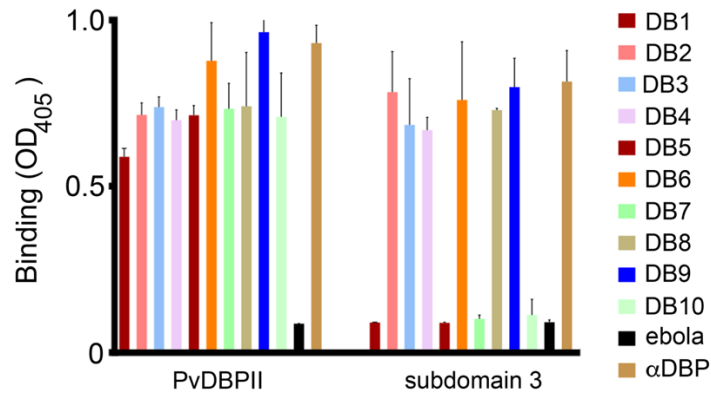

**Supplementary Figure 4: Analysis of the binding of monoclonal antibodies to *PvDBP II* subdomain 3**

An ELISA of the ten anti-*PvDBP II* mAbs (at 10 µg/mL) binding to recombinant *PvDBP II* (left) and subdomain 3 (right). Columns represent the mean of three technical replicates, while the error bars represent the standard deviation and the assay was performed twice with similar results. Human polyclonal anti-*PvDBP II* serum (αDBP) from the VAC051 clinical trial<sup>19</sup> at 1:100 dilution and a human anti-*Ebolavirus* IgG1 mAb (ebola) at 10 µg/mL were used as positive and negative controls, respectively.

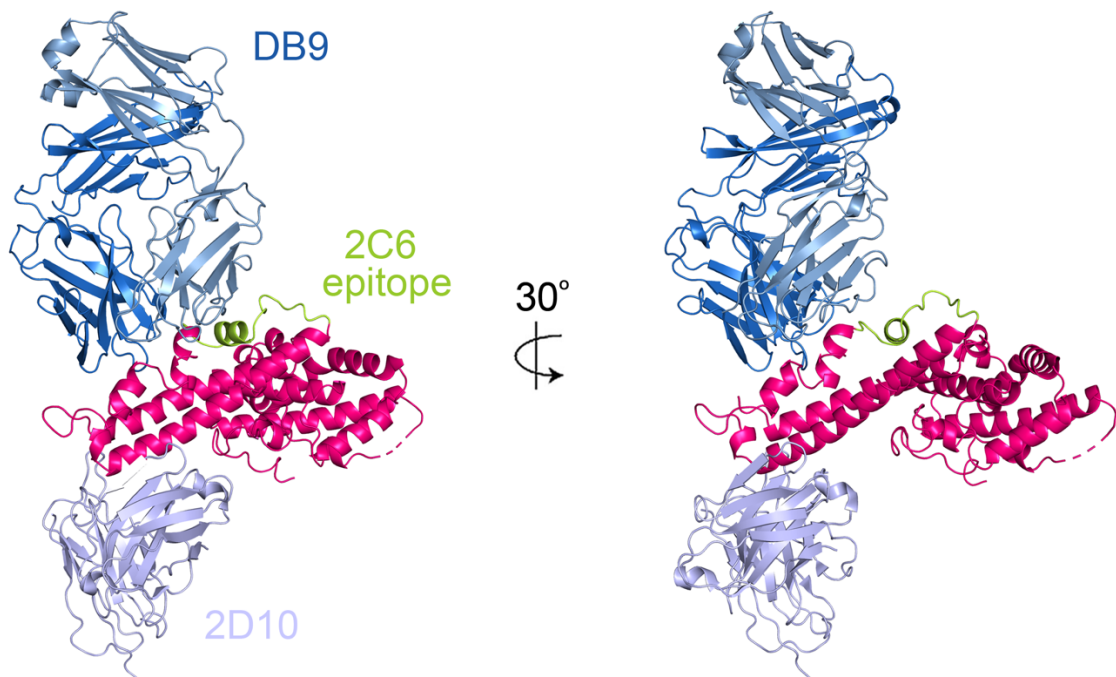

**Supplementary Figure 5: Comparison of the epitope for DB9 with those of previously identified mouse monoclonal antibodies**

*PvDBP II* is shown in pink and DB9 in dark blue. The ScFv fragment of mouse antibody 2D10<sup>26</sup> is shown in lilac while the epitope of 2C6 in *PvDBP II*, identified by hydrogen-deuterium exchange mass spectrometry is shown in green.

**Supplementary Table 1: Genetic lineage of heavy and light chain variable regions from PvDBPII-specific mAbs**

The allele usage, amino acid sequences and percentage of nucleotide substitutions relative to germline are shown.

| mAb | Chain | Fv allele usage and amino acid sequence                                                                                                                                                        | Germline change |
|-----|-------|------------------------------------------------------------------------------------------------------------------------------------------------------------------------------------------------|-----------------|
| DB1 | heavy | IGHV5-51*03 IGHD3-22*01 IGHJ3*02<br>EVQLVQSGAEVKKPGESLKISCKGSGYSFTDYWIGWVRQMPGKG<br>LEWMGIIYAGDSDTRYSPSFQGVVITISADKSI STASLQWSSLKA<br>SDTAMYYCARLAYDSSGYYAFDIWGQGMVTVSS                        | 1.7% (5/294)    |
|     | light | IGKV1-39*01,IGKV1D-39*01 IGKJ5*01<br>DIVMTQSPSSLSASVGRVTITCRASQTISSYLNWYQQKPGKAP<br>KLLIYAASSLQSGVPSRFSGSGSGTDFTLTISSLPEDFATYYC<br>QQSYSTPLITFGQGRLEIKRTV                                      | 1.7% (5/286)    |
| DB2 | heavy | IGHV4-59*08 IGHD6-13*01 IGHJ3*02<br>QVQLQESGPGLVKPSSETLSLTCTVSGGSISSYYWSWIRQPPGKG<br>LEWIGYISYTGSTNYPNPSLKSRVTISVDTSKNQFSLKLSVTAA<br>DTAVYSCARHFHSS TAAAFDIWGQGMVTVSS                          | 1.4% (4/293)    |
|     | light | IGKV3-20*01, IGKV3D-20*01, IGKJ1*01<br>EIVLTQSPGTLSPGEGATLSCRASQSVSN SYLAWYQQKPGQA<br>PRLLIYGASIRATGIPDRFSGSGSGTDFTLTISRLEPEDFAVYY<br>CQQYGRSPRT                                               | 2.1% (6/289)    |
| DB3 | heavy | IGHV4-31*03 IGHD2-2*01,IGHD2-2*02,IGHD2-2*03 IGHJ4*02<br>QLQLVESGPGLVKPSQTLTCTVSGGSTSSGGYYWNWIRQHPG<br>KGLEWIGYIHNSGTYNPNPSLKSRIISVDTSKHQFSLRLRSVT<br>AADTAEYYCARSQGYCSSSSCLLPRGYFDYWGPGLVTVSS | 6.4% (19/297)   |
|     | light | IGLV1-51*01 IGLJ2*01,IGLJ3*01<br>QSALTQPPSVSAAPGQKVTISCSGSSSNIGNNFVSWYQLFPGTA<br>PKLLIYDNNRPSGIPDRFSGSRSGTSATLGITGLQTGDEADYY<br>CGTWDSLSAVVFGGGTKLTVLGQP                                       | 3.7% (11/295)   |
| DB4 | heavy | IGHV1-69*06 IGHD6-6*01 IGHJ4*02<br>QLVQSGAEVKKPGSSVKVSKASGDTSSSYAISWVRQAPGQGLE<br>WMGGIIPIFGTANYAQKFQGRFTITAHKSTSTAYMELSSLRSDD<br>TAVYYCARDGGHHGQLVFDYWGQGLVTVSS                               | 2.7% (8/295)    |

|     |       |                                                                                                                                                                                                 |              |
|-----|-------|-------------------------------------------------------------------------------------------------------------------------------------------------------------------------------------------------|--------------|
|     | light | IGKV1-16*02 IGKJ4*01<br>DIQLTQSPSSLSASVGDVRTITCRASQVISNYLAWFQQKPGKAP<br>KSLIYAASSLQSGVPSKFSGSGSGTDFTLTISLQPEDFATYYC<br>QQYNSYPLTFGGGTKVEIRRTV                                                   | 1.4% (4/284) |
| DB5 | heavy | IGHV1-46*03 IGHD1-26*01,IGHD4-11*01,IGHD4-4*01 IGHJ6*02<br>QVQLVQSGAEVKKPGASVKVSKASGYTFTSYMHVWRQAPGQG<br>LEWMGIINPSGGSTSYAQKFQGRVTMTRDTSTSTVYMELSSLRS<br>EDTAVYFCARDNSEGAAYSYYYYYGMDVWGQTTVTVSS | 0.7% (2/296) |
|     | light | IGLV1-44*01 IGLJ3*02<br>QSALTQPPSASGTPGQRTVITSCSGSSSNIGSNTVNWYQQVPGTA<br>PKLLIYSNNQRPSGVPDRFSGSKSGTSASLAISGLQSEDEADYY<br>CAAWDDSLNGPRFGGGTKLTVLGQP                                              | 1% (3/296)   |
| DB6 | heavy | IGHV1-2*02 IGHD3-3*02,IGHD5-12*01,IGHD6-13*01 IGHJ6*02<br>QLVQSGAEVKKPGASVKVSKASGYSTGYFLHWVRQAPGQGLE<br>WMGWINPNSGGTKYAQKFQGRVTMTRDTSISTAYMELSRRLSDD<br>TAVYYCARGRLYSIAWYSDYGLDVWGQTTVTVSS      | 2.4% (7/294) |
|     | light | IGKV3-20*01 IGKJ4*01<br>EIVLTQSPGTLTSLSPGERATLSCRASQSVTSTYLAWYQQKPGQA<br>PRLLIYGASSRATGIPDRFSGSGSGTDFTLTISRLEPEDFAVYY<br>CQQFGSSSLTFGGGTKVEIKRT                                                 | 1.4% (4/286) |
| DB7 | heavy | IGHV4-39*01 IGHD3-10*01,IGHD3-10*02,IGHD5-18*01<br>IGHJ5*02<br>QVQLQESGPGLVKPSSETLSLTCTVSGGSIXSISYFWGWIRQPPG<br>KGLEWIGSIYYSGSTYYNPSLKSRTVTSVDTSKNQFSLKLSST<br>AADTAVYFCARRSLGYFFGPWGQTLVTVSS   | 2.7% (8/298) |
|     | light | IGLV3-21*02 IGLJ2*01,IGLJ3*01<br>SYELTQPPSVSVAPGQTARITCGGNNIGSKRVHWYQQKPGQAPV<br>LVVYDDSDRPSGIPERFSGSNGNTATLTIXWVEAGDEADYYCQ<br>LWDTSSDHPVFGGKTLTVLGX                                           | 2.4% (7/290) |
| DB8 | heavy | IGHV1-3*01 IGHD6-19*01 IGHJ4*02<br>QVQLVQSGAEVKKPGASVKVSKASGYTFSSYAMHWVRQAPGQR<br>LEWMGWINAGNGNTKYSQKFQDRVTITRDTASASTAYMELSSLSS<br>EDTAVYYCARSYRSSIGWFWMFDYWGQTLVTVSS                           | 2% (6/294)   |
|     | light | IGKV4-1*01 IGKJ2*01<br>DIVMTQSPDSLGVSLGERATINCKSSQSVLYSSNNKNYLAWYQQ                                                                                                                             | 3% (9/302)   |

|      |       |                                                                                                                                                                                       |               |
|------|-------|---------------------------------------------------------------------------------------------------------------------------------------------------------------------------------------|---------------|
|      |       | KPGQPPKLLIYWASTRESGVPDRFSGSGSGTDFTLTITGLQAED<br>VAVYYCLQYYSIPYTFGQGTKVEIKRTV                                                                                                          |               |
| DB9  | heavy | IGHV4-39*02 IGH1-1*01,IGH1-14*01,IGH1-20*01 IGH2*01<br>EVQLQESGPGLVKPSSETLSLTCTVSGGSVSSSTYYWGWRQPPG<br>KGLEWIGSIYYSGSTYYNPSLKSRVTISVDTSKNQFSLKLSSTV<br>AADTAVYYCARDGTGALDLWGRGTLVTVSS | 2.3% (7/298)  |
|      | light | IGKV1-5*03 IGK1*01<br>DIVMTQSPSTLSASVGRVTITCRASQSISSWLAHYQORPGKAP<br>RLLIYKASSLLSGVPSRFGSGSGTDFTLTISLQPDFFATYHC<br>QHYNTYPWTFGQGTKVEIKRTV                                             | 4.4% (12/274) |
| DB10 | heavy | IGHV3-21*01 IGH3-10*01,IGH3-10*02 IGH6*02<br>QVQLVESGGGLVKGSSLRSLCAASGFTFSTYSMNWVRQAPGKG<br>LEWVSSITSSSSYMDYADSVKGRFTISRDNKNSLYLQMTSLRA<br>EDTAVYYCARDVAGPFYFYAMDVWGQGTTVTVSS         | 2.4% (7/295)  |
|      | light | IGLV2-14*01 IGL2*01,IGL3*01<br>NFVLTQPASVSGSPGQSITISCTGTSSDVGGYNFVSWYQQHPGK<br>APKLMIEVSDRPSGVSNRFGSGSKSGNTASLTISGLQAEDVADY<br>YCSSYTSSTVVFVGGGKTLTVLGQP                              | 0.7% (2/284)  |



**Supplementary Table 2: Kinetic parameters for binding of antibodies to PvDBPII**

| <b>mAb</b> | <b><math>k_{on}</math> (<math>M^{-1}s^{-1}</math>)</b> | <b><math>k_{off}</math> (<math>s^{-1}</math>)</b> | <b><math>K_D</math> (<math>\mu M</math>)</b> |
|------------|--------------------------------------------------------|---------------------------------------------------|----------------------------------------------|
| DB1        | 1.88E+07                                               | 6.46E-03                                          | 344                                          |
| DB2        | 9.02E+05                                               | 6.05E-04                                          | 671                                          |
| DB3        | 2.98E+06                                               | 4.27E-04                                          | 143                                          |
| DB4        | 1.30E+06                                               | 4.39E-04                                          | 337                                          |
| DB5        | 2.33E+06                                               | 4.33E-04                                          | 186                                          |
| DB6        | 8.65E+06                                               | 2.53E-04                                          | 29.2                                         |
| DB7        | 1.72E+07                                               | 1.13E-04                                          | 6.55                                         |
| DB8        | 1.73E+06                                               | 3.92E-04                                          | 227                                          |
| DB9        | 1.79E+07                                               | 3.57E-04                                          | 20.0                                         |
| DB10       | 1.06E+07                                               | 5.05E-04                                          | 47.8                                         |

**Supplementary Table 3: Data collection and refinement statistics**

|                                                     | PvDBP1I:DB9                |
|-----------------------------------------------------|----------------------------|
| <b>Data collection</b>                              |                            |
| Space group                                         | P6 <sub>2</sub> 22         |
| Cell dimensions                                     |                            |
| <i>a</i> , <i>b</i> , <i>c</i> (Å)                  | 173.58, 173.58, 169.88     |
| $\alpha$ , $\beta$ , $\gamma$ (°)                   | 90.0, 90.0, 120.0          |
| Resolution (Å)                                      | 84.94 – 3.04 (3.09 – 3.04) |
| <i>R</i> <sub>PIM</sub>                             | 4.0 (46.9)                 |
| <i>I</i> / $\sigma$ <i>I</i>                        | 12.8 (1.2)                 |
| Completeness (%)                                    | 100.0 (100.0)              |
| Redundancy                                          | 19.6 (20.1)                |
| <b>Refinement</b>                                   |                            |
| Resolution (Å)                                      | 3.04                       |
| No. reflections                                     | 30703                      |
| <i>R</i> <sub>work</sub> / <i>R</i> <sub>free</sub> | 20.0 / 23.8                |
| No. atoms                                           |                            |
| Protein                                             | 5754                       |
| Ligand/ion                                          | 0                          |
| Water                                               | 0                          |
| <i>B</i> -factors                                   |                            |
| Protein                                             | 115.3                      |
| R.m.s. deviations                                   |                            |
| Bond lengths (Å)                                    | 0.01                       |
| Bond angles (°)                                     | 1.24                       |

All structures were determined from one crystal.

Values in parentheses are for highest-resolution shell.

**Supplementary Table 4: List of contacts between PvDBPII and DB9**

| <b>PvDBPII residue</b> | <b>Group</b> | <b>Fab Chain</b> | <b>Residue</b> | <b>Group</b> | <b>Interaction</b> |
|------------------------|--------------|------------------|----------------|--------------|--------------------|
| K412                   | Side Chain   | Heavy Chain      | Y74            | Side Chain   | Hydrogen bond      |
| D476                   | Side Chain   | Light Chain      | S75            | Side Chain   | Hydrogen bond      |
| E484                   | Side Chain   | Heavy Chain      | E20            | Main Chain   | Hydrogen bond      |
| E484                   | Side Chain   | Heavy Chain      | G45            | Main Chain   | Hydrogen bond      |
| N486                   | Side Chain   | Heavy Chain      | R118           | Side Chain   | Hydrogen bond      |
| E487                   | Side Chain   | Light Chain      | Y68            | Side Chain   | Hydrogen bond      |
| E487                   | Side Chain   | Light Chain      | S75            | Main Chain   | Hydrogen bond      |
| V488                   | Side Chain   | Light Chain      | Y68            | Side Chain   | Hydrophobic        |
| V488                   | Side Chain   | Light Chain      | L74            | Side Chain   | Hydrophobic        |
| N492                   | Side Chain   | Heavy Chain      | T121           | Main Chain   | Hydrogen bond      |
| E493                   | Side Chain   | Heavy Chain      | T52            | Side Chain   | Hydrogen bond      |
| R497                   | Side Chain   | Light Chain      | W51            | Side Chain   | Cation-pi          |
| R497                   | Main Chain   | Heavy Chain      | T121           | Side Chain   | Hydrogen bond      |
| R497                   | Side Chain   | Heavy Chain      | T121           | Main Chain   | Hydrogen bond      |
| G499                   | Main Chain   | Heavy Chain      | T52            | Main Chain   | Hydrogen bond      |
| A500                   | Main Chain   | Heavy Chain      | S51            | Main Chain   | Hydrogen bond      |
| E503                   | Side Chain   | Heavy Chain      | Y54            | Side Chain   | Hydrogen bond      |
| E503                   | Side Chain   | Heavy Chain      | Y79            | Side Chain   | Hydrogen bond      |

**Supplementary Table 5: Summary of the properties of the monoclonal antibodies**

|      | $k_{on}$<br>( $M^{-1} s^{-1}$ ) | $k_{off}$<br>( $s^{-1}$ ) | $K_D$<br>( $\mu M$ ) | Inhibitory<br>in protein-<br>based<br>binding<br>assay | Inhibitory in<br>transgenic<br><i>P. knowlesi</i><br>assay | Inhibitory<br>against<br>homologous<br><i>P. vivax</i><br>isolates | % of <i>P.</i><br><i>vivax</i><br>strains<br>where<br>invasion<br>inhibited | Binds to<br>PvDBPII<br>subdomain<br>3 |
|------|---------------------------------|---------------------------|----------------------|--------------------------------------------------------|------------------------------------------------------------|--------------------------------------------------------------------|-----------------------------------------------------------------------------|---------------------------------------|
| DB1  | $1.88 \times 10^7$              | $6.46 \times 10^{-3}$     | 344                  | no                                                     | potent                                                     | potent                                                             | 50                                                                          | no                                    |
| DB2  | $9.02 \times 10^5$              | $6.05 \times 10^{-4}$     | 671                  | yes                                                    | low                                                        | low                                                                | 0                                                                           | yes                                   |
| DB3  | $2.98 \times 10^6$              | $4.27 \times 10^{-4}$     | 143                  | no                                                     | intermediate                                               | intermediate                                                       | 0                                                                           | yes                                   |
| DB4  | $1.30 \times 10^6$              | $4.39 \times 10^{-4}$     | 337                  | no                                                     | low                                                        | low                                                                | 0                                                                           | yes                                   |
| DB5  | $2.33 \times 10^6$              | $4.33 \times 10^{-4}$     | 186                  | yes                                                    | intermediate                                               | n/a                                                                | 66                                                                          | no                                    |
| DB6  | $8.65 \times 10^6$              | $2.53 \times 10^{-4}$     | 29.2                 | yes                                                    | intermediate                                               | n/a                                                                | 33                                                                          | yes                                   |
| DB7  | $1.72 \times 10^7$              | $1.13 \times 10^{-4}$     | 6.55                 | yes                                                    | intermediate                                               | intermediate                                                       | 50                                                                          | no                                    |
| DB8  | $1.73 \times 10^6$              | $3.92 \times 10^{-4}$     | 227                  | no                                                     | low                                                        | low                                                                | 0                                                                           | yes                                   |
| DB9  | $1.79 \times 10^7$              | $3.57 \times 10^{-4}$     | 20.0                 | yes                                                    | potent                                                     | potent                                                             | 91                                                                          | yes                                   |
| DB10 | $1.06 \times 10^7$              | $5.05 \times 10^{-4}$     | 47.8                 | no                                                     | potent                                                     | potent                                                             | 40                                                                          | no                                    |

**Supplementary Table 6: Primers.**

| <b>Primer number</b> | <b>Primer sequence (5' to 3')</b>                        |
|----------------------|----------------------------------------------------------|
| 1                    | ACAGGTGCCCACTCCCAGGTGCAG                                 |
| 2                    | AAGGTGTCCAGTGTGARGTGCAG                                  |
| 3                    | CCCAGATGGGTCCTGTCCCAGGTGCAG                              |
| 4                    | CAAGGAGTCTGTTCCGAGGTGCAG                                 |
| 5                    | GGAAGGTGTGCACGCCGCTGGTC                                  |
| 6                    | ATGAGGSTCCCYGCTCAGCTGCTGG                                |
| 7                    | CTCTTCCTCTGCTACTCTGGCTCCCAG                              |
| 8                    | ATTTCTCTGTTGCTCTGGATCTCTG                                |
| 9                    | GTTTCTCGTAGTCTGCTTTGCTCA                                 |
| 10                   | GGTCCTGGGCCAGTCTGTGCTG                                   |
| 11                   | GGTCCTGGGCCAGTCTGCCCTG                                   |
| 12                   | GCTCTGTGACCTCTATGAGCTG                                   |
| 13                   | GGTCTCTCTCSCAGCYTGTGCTG                                  |
| 14                   | GTTCTTGGGCCAATTTTATGCTG                                  |
| 15                   | GGTCCAATTCYAGGCTGTGGTG                                   |
| 16                   | GAGTGGATTCTCAGACTGTGGTG                                  |
| 17                   | CACCAGTGTGGCCTTGTGGCTTG                                  |
| 18                   | CTTTTTCTAGTAGCAACTGCAACCGGTGTACATTCCGAGGTGCAGCTGGTGCAG   |
| 19                   | CTTTTTCTAGTAGCAACTGCAACCGGTGTACATTCTGAGGTGCAGCTGGTGGAG   |
| 20                   | CTTTTTCTAGTAGCAACTGCAACCGGTGTACATTCCGAGGTGCAGCTGCAGGAG   |
| 21                   | CTTTTTCTAGTAGCAACTGCAACCGGTGTACATTCTGAGGTGCAGCTGTTGGAG   |
| 22                   | CTTTTTCTAGTAGCAACTGCAACCGGTGTACATTCCGAGGTGCAGCTACAGCAGTG |
| 23                   | CTTTTTCTAGTAGCAACTGCAACCGGTGTACATTCCGAGGTTAGCTGGTGCAG    |
| 24                   | CTTTTTCTAGTAGCAACTGCAACCGGTGTACATTCCGAGGTCCAGCTGGTACAG   |
| 25                   | CTTTTTCTAGTAGCAACTGCAACCGGTGTACATTCTGAAGTGCAGCTGGTGGAG   |
| 26                   | CTTTTTCTAGTAGCAACTGCAACCGGTGTACATTCCGAGGTACAGCTGCAGCAG   |
| 27                   | CTTTTTCTAGTAGCAACTGCAACCGGTGTACATTCCGAGGTGCAGCTGCAGGAG   |
| 28                   | CTTTTTCTAGTAGCAACTGCAACCGGTGTACATTCTCAGGTGCAGCTGGTGGAG   |
| 29                   | GATGGGCCCTTGGTCGACGCTGAGGAGACGGTGACCAG                   |
| 30                   | GATGGGCCCTTGGTCGACGCTGAAGAGACGGTGACCATTG                 |
| 31                   | GATGGGCCCTTGGTCGACGCTGAGGAGACGGTGACCGTG                  |
| 32                   | CTTTTTCTAGTAGCAACTGCAACCGGTGTACATTCTGACATCCAGATGACCCAGTC |
| 33                   | CTTTTTCTAGTAGCAACTGCAACCGGTGTACATTGACATCCAGTTGACCCAGTCT  |
| 34                   | CTTTTTCTAGTAGCAACTGCAACCGGTGTACATTGTGCCATCCGGATGACCCAGTC |
| 35                   | CTTTTTCTAGTAGCAACTGCAACCGGTGTACATGGGGATATTGTGATGACCCAGAC |
| 36                   | CTTTTTCTAGTAGCAACTGCAACCGGTGTACATGGGGATATTGTGATGACTCAGTC |
| 37                   | CTTTTTCTAGTAGCAACTGCAACCGGTGTACATTGAGAAATTGTGTTGACACAGTC |
| 38                   | CTTTTTCTAGTAGCAACTGCAACCGGTGTACATTGAGAAATAGTGATGACGCAGTC |

|    |                                                           |
|----|-----------------------------------------------------------|
| 39 | CTTTTTCTAGTAGCAACTGCAACCGGTGTACATTCAGAAATTGTGTTGACGCAGTCT |
| 40 | CTTTTTCTAGTAGCAACTGCAACCGGTGTACATTCGGACATCGTGATGACCCAGTC  |
| 41 | ATGGTGCAGCCACCGTACGTTTGATYTCCACCTTGGTC                    |
| 42 | ATGGTGCAGCCACCGTACGTTTGATATCCACTTTGGTC                    |
| 43 | ATGGTGCAGCCACCGTACGTTTAATCTCCAGTCGTGTC                    |
| 44 | ATGGTGCAGCCACCGTACGTCTGATTTCCACCTTGGTC                    |
| 45 | CTTTTTCTAGTAGCAACTGCAACCGGTTCTGGGCCAGTCTGTGCTGACKCAG      |
| 46 | CTTTTTCTAGTAGCAACTGCAACCGGTTCTGGGCCAGTCTGCCCTGACTCAG      |
| 47 | CTTTTTCTAGTAGCAACTGCAACCGGTTCTGTGACCTCCTATGAGCTGACWCAG    |
| 48 | CTTTTTCTAGTAGCAACTGCAACCGGTTCTCTCSCAGCYTGTGCTGACTCA       |
| 49 | CTTTTTCTAGTAGCAACTGCAACCGGTTCTGGGCCAATTTATGCTGACTCAG      |
| 50 | CTTTTTCTAGTAGCAACTGCAACCGGTTCCAATTCYAGRCTGTGGTGACYCAG     |
| 51 | GGCTTGAAGCTCCTCACTCGAGGGYGGGAACAGAGTG                     |
